# Supplementary material for: Cardiac Structure and Function and Diabetes‐Related Risk of Death or Heart Failure in Older Adults
Source: PubMed Central journal article supplement — J Am Heart Assoc. 2022 Mar 5;11(6):e022308. doi: 10.1161/JAHA.121.022308 (PMC9075318; doi:10.1161/jaha.121.022308), 2022-03-05
Supplement: JAH3-11-e022308-s001.pdf [file JAH3-11-e022308-s001.pdf]

# **Supplemental Material**

**Table S1. Frequencies of Clinical Characteristics of Atherosclerosis Risk in the Community (ARIC) Visit 5 Participants.**

| <b>Clinical Variable</b>              | <b>N (%)</b> |
|---------------------------------------|--------------|
| <b>Age, y</b>                         | 6059 (100%)  |
| <b>Male sex</b>                       | 6059 (100%)  |
| <b>Black</b>                          | 6059 (100%)  |
| <b>Hypertension</b>                   | 6059 (100%)  |
| <b>Ever smoker</b>                    | 6059 (100%)  |
| <b>Coronary Artery Disease</b>        | 6059 (100%)  |
| <b>History of Atrial Fibrillation</b> | 5943 (98%)   |
| <b>Heart Failure</b>                  | 6059 (100%)  |
| <b>Insulin Therapy</b>                | 6059 (100%)  |
| <b>HbA1c (%)</b>                      | 6042 (99%)   |
| <b>Lipid-lowering medications</b>     | 6026 (99%)   |
| <b>BMI (Kg/m2)</b>                    | 6025 (99%)   |
| <b>SBP (mmHg)</b>                     | 6038 (99%)   |
| <b>Heart rate (bpm)</b>               | 5928 (97%)   |
| <b>eGFR, mL/min per 1.73 m2</b>       | 6042 (99%)   |
| <b>LDL cholesterol, mg/dL</b>         | 6001 (99%)   |
| <b>hs-CRP, mg/L</b>                   | 6040 (99%)   |
| <b>NT-pro-BNP (ng/l)</b>              | 5898 (97%)   |
| <b>hs-troponin (ng/l)</b>             | 5838 (96%)   |
| <b>LVEDDi, cm/m2</b>                  | 5942 (98%)   |
| <b>IVS, cm</b>                        | 6013 (99%)   |
| <b>LVMi, g/m2</b>                     | 6001 (99%)   |
| <b>LVH</b>                            | 6001 (99%)   |
| <b>LVEDVi, ml/m2</b>                  | 5825 (96%)   |
| <b>LVESVi, ml/m2</b>                  | 5825 (96%)   |
| <b>LVEF, %</b>                        | 5861 (96%)   |
| <b>GLS, %</b>                         | 5812 (96%)   |
| <b>RV FAC, %</b>                      | 5500 (90%)   |
| <b>LAVi, ml/m2</b>                    | 5986 (98%)   |
| <b>E-A ratio</b>                      | 5770 (95%)   |
| <b>E/e' average</b>                   | 6015 (99%)   |
| <b>PASP, mmHg</b>                     | 3535 (58.3%) |

BMI, body mass index; eGFR, estimated glomerular filtration rate by Chronic Kidney Disease Epidemiology Collaboration equation; HbA1c, glycated hemoglobin; HDL, high-density lipoprotein; hs-CRP, high sensitivity-C-reactive protein; LDL, low-density lipoprotein; NT-pro-BNP, N-terminal pro-B-type natriuretic peptide; SBP, systolic blood pressure; GLS, global longitudinal strain; IVS, interventricular septum; LAVi, left atrial volume index; LVEDDi, left ventricular end-diastolic diameter index; LVEDVi, left ventricular end-diastolic volume index; LVESVi, left ventricular end-systolic volume index; LVEF, left ventricular ejection fraction; LVH, left ventricular hypertrophy; LVMi, LV mass index; RV FAC, right ventricular fractional area change.

**Table S2. Adjusted association of Echocardiographic Characteristics at ARIC visit 5 and subsequent HF according to glycemic status.**

|                                            | No DM (122/2208) 1.05 100 py |           |         |      | Pre DM (113/1818) 1.18 100 py |           |         |     | DM (227/2033) 2.25 100 py |           |         |     |
|--------------------------------------------|------------------------------|-----------|---------|------|-------------------------------|-----------|---------|-----|---------------------------|-----------|---------|-----|
|                                            | HR                           | 95% CI    | p       | Z    | HR                            | 95% CI    | p       | Z   | HR                        | 95% CI    | p       | Z   |
| <b>LV Structure</b>                        |                              |           |         |      |                               |           |         |     |                           |           |         |     |
| LVEDDi, per 0.1 cm/m <sup>2</sup> increase | 1.16                         | 1.09-1.20 | < 0.001 | 5.5  | 1.16                          | 1.11-1.24 | < 0.001 | 5.4 | 1.17                      | 1.09-1.25 | < 0.001 | 4.3 |
| IVS, per 0.1 cm increase                   | 1.04                         | 0.97-1.13 | 0.26    | 1.1  | 1.15                          | 1.05-1.26 | 0.003   | 2.9 | 1.21                      | 1.09-1.33 | 0.001   | 3.4 |
| LVMi, per 10 g/m <sup>2</sup>              | 1.14                         | 1.10-1.21 | < 0.001 | 5.7  | 1.33                          | 1.25-1.43 | < 0.001 | 8.3 | 1.27                      | 1.18-1.35 | < 0.001 | 7.1 |
| LVH                                        | 2.15                         | 1.55-2.96 | < 0.001 | 4.6  | 4.02                          | 2.57-6.28 | < 0.001 | 6.2 | 3.0                       | 1.92-4.67 | < 0.001 | 4.8 |
| EDVi, per 5 ml/m <sup>2</sup> increase     | 1.19                         | 1.12-1.24 | < 0.001 | 6.32 | 1.19                          | 1.11-1.26 | < 0.001 | 4.7 | 1.20                      | 1.11-1.30 | < 0.001 | 4.8 |
| ESVi, per 5 ml/m <sup>2</sup> increase     | 1.22                         | 1.14-1.31 | < 0.001 | 5.7  | 1.25                          | 1.13-1.37 | < 0.001 | 4.4 | 1.31                      | 1.22-1.45 | < 0.001 | 6.2 |
| <b>Systolic Function</b>                   |                              |           |         |      |                               |           |         |     |                           |           |         |     |
| LVEF, per 5 % increase                     | 0.83                         | 0.77-0.91 | < 0.001 | 4.2  | 0.86                          | 0.77-0.96 | 0.009   | 2.5 | 0.80                      | 0.71-0.91 | < 0.001 | 3.5 |
| GLS, per 1 % increase                      | 1.17                         | 1.11-1.22 | < 0.001 | 5.7  | 1.10                          | 1.03-1.18 | 0.006   | 2.8 | 1.13                      | 1.05-1.20 | 0.003   | 3.0 |
| RV FAC, per 5 % increase                   | 0.90                         | 0.82-1.0  | 0.04    | 2.0  | 1.01                          | 0.89-1.15 | 0.828   | 0.2 | 1.05                      | 0.92-1.20 | 0.474   | 0.7 |
| <b>Diastolic Function</b>                  |                              |           |         |      |                               |           |         |     |                           |           |         |     |
| LAVi, per 5 ml/m <sup>2</sup> increase     | 1.24                         | 1.18-1.3  | < 0.001 | 8.7  | 1.13                          | 1.09-1.18 | < 0.001 | 5.8 | 1.11                      | 1.05-1.15 | < 0.001 | 3.9 |
| E–A ratio, per 0.1 cm/s increase           | 1.09                         | 1.05-1.12 | < 0.001 | 4.0  | 1.09                          | 1.04-1.15 | < 0.001 | 3.8 | 1.16                      | 1.12-1.21 | < 0.001 | 7.1 |
| E/e' average, per 1U increase              | 1.05                         | 1.03-1.07 | < 0.001 | 5.0  | 1.10                          | 1.07-1.13 | < 0.001 | 6.1 | 1.08                      | 1.04-1.10 | < 0.001 | 4.3 |

Adjustment: gender, race/center, log-total cholesterol, log-LDL, statins medication, history of hypertension, systolic blood pressure, heart rate, QRS interval, eGFR, BMI, smoking status, prevalent HF, heart valve disease, history of ICD/PM., stratified by age and history of coronary artery disease. GLS, global longitudinal strain; IVS, interventricular septum; LAVi, left atrial volume index; LVEDDi, left ventricular end-diastolic diameter index; LVEDVi, left ventricular end-diastolic volume index; LVESVi, left ventricular end-systolic volume index; LVEF, left ventricular ejection fraction; LVH, left ventricular hypertrophy; LVMi, LV mass index; RV FAC, right ventricular fractional area change.

**Table S3. Adjusted association of Echocardiographic Characteristics and death or HF according to glycemic status in subjects free of prevalent heart disease (n = 4414).**

|                                            | No DM (201/1730) 2.18 100 py |           |        |     | Pre DM (162/1354) 2.22 100 py |           |        |     | DM (216/1330) 3.09 100 py |           |        |     |
|--------------------------------------------|------------------------------|-----------|--------|-----|-------------------------------|-----------|--------|-----|---------------------------|-----------|--------|-----|
|                                            | HR                           | 95% CI    | p      | Z   | HR                            | 95% CI    | p      | Z   | HR                        | 95% CI    | p      | Z   |
| <b>LV Structure</b>                        |                              |           |        |     |                               |           |        |     |                           |           |        |     |
| LVEDDi, per 0.1 cm/m <sup>2</sup> increase | 1.08                         | 1.1-1.16  | 0.04   | 2.2 | 1.15                          | 1.12-1.22 | <0.001 | 4.4 | 1.10                      | 1.04-1.17 | 0.003  | 3.2 |
| IVS, per 0.1 cm increase                   | 1.05                         | 0.95-1.17 | 0.42   | 0.8 | 1.07                          | 0.96-1.20 | 0.29   | 1.0 | 1.16                      | 1.06-1.27 | 0.001  | 3.3 |
| LVMi, per 10 g/m <sup>2</sup>              | 1.15                         | 1.05-1.26 | 0.003  | 2.9 | 1.21                          | 1.12-1.31 | <0.001 | 4.8 | 1.28                      | 1.19-1.36 | <0.001 | 6.5 |
| LVH                                        | 2.25                         | 1.40-3.61 | 0.001  | 3.3 | 1.96                          | 1.22-3.15 | 0.006  | 2.7 | 1.99                      | 1.3-3.03  | 0.001  | 3.1 |
| EDVi, per 5 ml/m <sup>2</sup> increase     | 1.06                         | 0.97-1.15 | 0.28   | 1.1 | 1.12                          | 1.03-1.20 | 0.013  | 2.6 | 1.16                      | 1.08-1.25 | <0.001 | 4.0 |
| ESVi, per 5 ml/m <sup>2</sup> increase     | 1.19                         | 1.01-1.4  | 0.04   | 2.0 | 1.22                          | 1.06-1.4  | 0.004  | 2.8 | 1.33                      | 1.19-1.48 | <0.001 | 5.0 |
| <b>Systolic Function</b>                   |                              |           |        |     |                               |           |        |     |                           |           |        |     |
| LVEF, per 5 % increase                     | 0.88                         | 0.77-0.99 | 0.036  | 2.1 | 0.90                          | 0.78-1.04 | 0.13   | 1.4 | 0.77                      | 0.68-0.87 | <0.001 | 4.1 |
| GLS, per 1 % increase                      | 1.07                         | 0.97-1.10 | 0.080  | 1.5 | 1.07                          | 1.0-1.15  | 0.047  | 2.0 | 1.07                      | 1.1-1.12  | 0.057  | 1.7 |
| RV FAC, per 5 % increase                   | 1.03                         | 0.93-1.15 | 0.53   | 0.6 | 0.98                          | 0.88-1.1  | 0.77   | 0.2 | 0.98                      | 0.88-1.09 | 0.661  | 0.4 |
| <b>Diastolic Function</b>                  |                              |           |        |     |                               |           |        |     |                           |           |        |     |
| LAVi, per 5 ml/m <sup>2</sup> increase     | 1.09                         | 1.03-1.14 | 0.010  | 2.7 | 1.10                          | 1.0-1.2   | 0.046  | 2.0 | 1.22                      | 1.13-1.31 | <0.001 | 5.0 |
| E–A ratio, per 0.1 cm/s increase           | 1.10                         | 1.05-1.15 | <0.001 | 3.9 | 1.08                          | 1.01-1.16 | 0.026  | 2.2 | 0.98                      | 0.92-1.05 | 0.64   | 0.4 |
| E/e' average, per 1U increase              | 1.05                         | 1.01-1.09 | 0.006  | 2.7 | 1.11                          | 1.06-1.16 | <0.001 | 4.4 | 1.02                      | 0.97-1.06 | 0.48   | 0.7 |

Adjustment: gender, race/center, log-total cholesterol, log-LDL, statins medication, history of hypertension, systolic blood pressure, heart rate, QRS interval, eGFR, BMI, smoking status, prevalent HF, heart valve disease, history of ICD/PM., stratified by age and history of coronary artery disease. GLS, global longitudinal strain; IVS, interventricular septum; LAVi, left atrial volume index; LVEDDi, left ventricular end-diastolic diameter index; LVEDVi, left ventricular end-diastolic volume index; LVESVi, left ventricular end-systolic volume index; LVEF, left ventricular ejection fraction; LVH, left ventricular hypertrophy; LVMi, LV mass index; RV FAC, right ventricular fractional area change.

**Table S4. Interaction of Echocardiographic Characteristics and the primary endpoint (death or HF) according to the glycemic status.**

|                                            | p for interaction for glycemic status |                        |
|--------------------------------------------|---------------------------------------|------------------------|
|                                            | Demographic adjusted                  | Multivariable adjusted |
| <b>LV Structure</b>                        |                                       |                        |
| LVEDDi, per 0.1 cm/m <sup>2</sup> increase | 0.79                                  | 0.74                   |
| IVS, per 0.1 cm increase                   | 0.60                                  | 0.23                   |
| LVMi, per 10 g/m <sup>2</sup>              | 0.51                                  | 0.41                   |
| LVH                                        | 0.37                                  | 0.36                   |
| EDVi, per 5 ml/m <sup>2</sup> increase     | 0.09                                  | 0.19                   |
| ESDVi, per 5 ml/m <sup>2</sup> increase    | 0.91                                  | 0.89                   |
| <b>Systolic function</b>                   |                                       |                        |
| LVEF, per 5 % increase                     | 0.38                                  | 0.87                   |
| GLS, per 1 % increase                      | 0.75                                  | 0.67                   |
| RV FAC, per 5 % increase                   | 0.10                                  | 0.15                   |
| <b>Diastolic function</b>                  |                                       |                        |
| LAVi, per 5 ml/m <sup>2</sup> increase     | < 0.001                               | < 0.001                |
| E–A ratio, per 0.1 cm/s increase           | 0.32                                  | 0.16                   |
| E/e' average, per 1U increase              | 0.44                                  | 0.21                   |

Demographic adjustment: age, gender, race/center. Multivariable adjusted: gender, race/center, log-total cholesterol, log-LDL, statins medication, history of hypertension, systolic blood pressure, heart rate, QRS interval, eGFR, BMI, smoking status, prevalent HF, heart valve disease, history of ICD/PM., stratified by age and history of coronary artery disease. GLS, global longitudinal strain; IVS, interventricular septum; LAVi, left atrial volume index; LVEDDi, left ventricular end-diastolic diameter index; LVEDVi, left ventricular end-diastolic volume index; LVESVi, left ventricular end-systolic volume index; LVEF, left ventricular ejection fraction; LVH, left ventricular hypertrophy; LVMi, LV mass index; RV FAC, right ventricular fractional area change. GLS, global longitudinal strain; IVS, interventricular septum; LAVi, left atrial volume index; LVEDDi, left ventricular end-diastolic diameter index; LVEDVi, left ventricular end-diastolic volume index; LVESVi, left ventricular end-systolic volume index; LVEF, left ventricular ejection fraction; LVH, left ventricular hypertrophy; LVMi, LV mass index; RV FAC, right ventricular fractional area change.

**Table S5. Interaction of Echocardiographic Characteristics and HF according to the glycemic status.**

|                                  | p for interaction for glycemic status |                        |
|----------------------------------|---------------------------------------|------------------------|
|                                  | Demographic adjusted                  | Multivariable adjusted |
| <b>LV Structure</b>              |                                       |                        |
| LVEDDi, per 0.1 cm/m2 increase   | 0.49                                  | 0.99                   |
| IVS, per 0.1 cm increase         | 0.032                                 | 0.010                  |
| LVMi, per 10 g/m2                | 0.009                                 | 0.011                  |
| LVH                              | 0.046                                 | 0.15                   |
| EDVi, per 5 ml/m2 increase       | 0.85                                  | 0.80                   |
| ESDVi, per 5 ml/m2 increase      | 0.21                                  | 0.13                   |
| <b>Systolic function</b>         |                                       |                        |
| LVEF, per 5 % increase           | 0.53                                  | 0.26                   |
| GLS, per 1 % increase            | 0.62                                  | 0.87                   |
| RV FAC, per 5 % increase         | 0.19                                  | 0.14                   |
| <b>Diastolic function</b>        |                                       |                        |
| LAVi, per 5 ml/m2 increase       | < 0.001                               | 0.001                  |
| E–A ratio, per 0.1 cm/s increase | 0.13                                  | 0.01                   |
| E/e' average, per 1U increase    | 0.31                                  | 0.28                   |

Demographic adjustment: age, gender, race/center. Multivariable adjusted: gender, race/center, log-total cholesterol, log-LDL, statins medication, history of hypertension, systolic blood pressure, heart rate, QRS interval, eGFR, BMI, smoking status, prevalent HF, heart valve disease, history of ICD/PM., stratified by age and history of coronary artery disease. GLS, global longitudinal strain; IVS, interventricular septum; LAVi, left atrial volume index; LVEDDi, left ventricular end-diastolic diameter index; LVEDVi, left ventricular end-diastolic volume index; LVESVi, left ventricular end-systolic volume index; LVEF, left ventricular ejection fraction; LVH, left ventricular hypertrophy; LVMi, LV mass index; RV FAC, right ventricular fractional area change.

**Table S6. Interaction of Echocardiographic Characteristics and death or HF according to the glycemic status in subjects free of prevalent heart disease (n = 4414).**

|                                            | p for interaction for glycemic status |                        |
|--------------------------------------------|---------------------------------------|------------------------|
|                                            | Demographic adjusted                  | Multivariable adjusted |
| <b>LV Structure</b>                        |                                       |                        |
| LVEDDi, per 0.1 cm/m <sup>2</sup> increase | 0.64                                  | 0.78                   |
| IVS, per 0.1 cm increase                   | 0.27                                  | 0.13                   |
| LVMi, per 10 g/m <sup>2</sup>              | 0.07                                  | 0.13                   |
| LVH                                        | 0.46                                  | 0.87                   |
| EDVi, per 5 ml/m <sup>2</sup> increase     | 0.020                                 | 0.024                  |
| ESDVi, per 5 ml/m <sup>2</sup> increase    | 0.25                                  | 0.28                   |
| <b>Systolic function</b>                   |                                       |                        |
| LVEF, per 5 % increase                     | 0.21                                  | 0.30                   |
| GLS, per 1 % increase                      | 0.50                                  | 0.48                   |
| RV FAC, per 5 % increase                   | 0.51                                  | 0.98                   |
| <b>Diastolic function</b>                  |                                       |                        |
| LAVi, per 5 ml/m <sup>2</sup> increase     | 0.011                                 | 0.004                  |
| E–A ratio, per 0.1 cm/s increase           | 0.21                                  | 0.09                   |
| E/e' average, per 1U increase              | 0.44                                  | 0.09                   |

Demographic adjustment: age, gender, race/center. Multivariable adjusted: gender, race/center, log-total cholesterol, log-LDL, statins medication, history of hypertension, systolic blood pressure, heart rate, QRS interval, eGFR, BMI, smoking status, prevalent HF, heart valve disease, history of ICD/PM., stratified by age and history of coronary artery disease. GLS, global longitudinal strain; IVS, interventricular septum; LAVi, left atrial volume index; LVEDDi, left ventricular end-diastolic diameter index; LVEDVi, left ventricular end-diastolic volume index; LVESVi, left ventricular end-systolic volume index; LVEF, left ventricular ejection fraction; LVH, left ventricular hypertrophy; LVMi, LV mass index; RV FAC, right ventricular fractional area change.



**Table S7. Contribution of cardiac structure and function and comorbidities to the risk of death or HF in the DM population without prevalent heart disease.**

|                                      | <i>HR (95% CI)</i> | <i>Attenuation of association (95% CI)</i> |
|--------------------------------------|--------------------|--------------------------------------------|
| <b>DM (vs. No DM)</b>                | 1.45 (1.22-1.71)   | REF                                        |
| + LV structure                       | 1.37 (1.15-1.62)   | 13% (3% to 33%)                            |
| + Systolic function                  | 1.35 (1.14-1.61)   | 10% (3% to 27%)                            |
| + Diastolic function                 | 1.38 (1.16-1.64)   | 4% (- 3% to 15%)                           |
| + All cardiac structure and function | 1.33 (1.11-1.59)   | 19% (6% to 47%)                            |
| + Comorbidities                      | 1.32 (1.11-1.63)   | 22% (-6% to 73%)                           |

Attenuation of association is the proportion of the association between diabetes and the risk of death or HF that can be accounted for by listed parameters of cardiac structure and function or clinical characteristics, adjusting for demographics. Analyses are restricted to participants with available measurements of cardiac structure and function. Demographics: age, gender, race/center. LV structure parameters include: left ventricular hypertrophy, LV mass, interventricular septum. Systolic function parameters include: global longitudinal strain. Diastolic function parameters include: left atrial volume index, index and E/e'. Comorbidities include: demographics + log-total cholesterol, log-LDL, statins medication, history of hypertension, systolic blood pressure, heart rate, QRS interval, eGFR, BMI, smoking status.
